# Supplementary material for: Age-of-onset information helps identify 76 genetic variants associated with allergic disease
Source: PLoS Genet. 2020 Jun 30;16(6):e1008725. doi: 10.1371/journal.pgen.1008725 (PMC7367489; doi:10.1371/journal.pgen.1008725)
Supplement: S7 Table — (XLS) [file pgen.1008725.s020.xls]

## Sheet: Supp Table 7
Supplementary Table 7. Sentinel SNPs in LD (r2>0.05) with variants previously reported to associate with at least one allergic disease
Sentinel SNP	Chr	Bp	Context	Correlated SNP reported in previous GWAS of allergic disease
				SNP	r2 with sentinel	Trait	Allele	OR	P-value	PMID	Date
Sentinel SNPs identified in the age-of-onset GWAS
rs115045402	1	152029548	S100A11-[]-TCHHL1	rs12123821	0.446873	allergy	T	1.111	7e-17	29083406	2017-10-30
rs12123821	1	152179152	RPTN-[]-HRNR	rs12123821	1	allergy	T	1.111	7e-17	29083406	2017-10-30
rs12123821	1	152179152	RPTN-[]-HRNR	rs11205006	0.126754	atopic_eczema	A	1.615	2e-25	25574825	2015-01-08
rs12123821	1	152179152	RPTN-[]-HRNR	rs12144049	0.126754	atopic_eczema	C	1.39	1e-16	25865352	2015-04-10
rs12123821	1	152179152	RPTN-[]-HRNR	rs12144049	0.126754	atopic_eczema	?	1.54	3e-30	25574825	2015-01-08
rs12123821	1	152179152	RPTN-[]-HRNR	rs6661961	0.0696904	atopic_eczema	T	0.338	9e-11	23886662	2013-07-25
rs12123821	1	152179152	RPTN-[]-HRNR	rs55879323	0.0661213	atopic_eczema	?	NA	3e-12	25574825	2015-01-08
rs61816761	1	152285861	[FLG]	rs61816761	1	allergy	A	1.224	7e-21	29083406	2017-10-30
rs61816761	1	152285861	[FLG]	rs61813875	0.502954	atopic_eczema	G	1.61	6e-29	26482879	2015-10-19
rs61816761	1	152285861	[FLG]	rs12081541	0.13171	childhood_onset_asthma,_atopic_eczema,_atopic_march	C	1.61	9e-11	26542096	2015-11-06
rs61816761	1	152285861	[FLG]	rs471144	0.119207	atopic_eczema	?	1.54	2e-12	25574825	2015-01-08
rs78037977	1	172715702	FASLG-[]--TNFSF18	rs78037977	1	childhood onset asthma	A	1.09	6.2e-13	30929738	2019-03-28
rs7521390	1	173141960	TNFSF18--[]-TNFSF4	rs6691738	0.973472	asthma	?	1.06045	3e-08	27182965	2016-05-16
rs7521390	1	173141960	TNFSF18--[]-TNFSF4	rs4090390	0.695459	allergy	A	1.048	1e-15	29083406	2017-10-30
rs13398375	2	8451701	[LINC00299]	rs367023	0.918143	allergy	?	1.0582	2e-11	27182965	2016-05-16
rs13398375	2	8451701	[LINC00299]	rs10174949	0.781112	allergy	G	1.066	7e-31	29083406	2017-10-30
rs13398375	2	8451701	[LINC00299]	rs13412757	0.626128	asthma	?	1.062	1e-08	27182965	2016-05-16
rs13398375	2	8451701	[LINC00299]	rs10199605	0.333265	atopic_eczema	G	1.04167	4e-08	26482879	2015-10-19
rs7559046	2	28644670	FOSL2-[]-PLB1	rs11677002	0.6	allergic rhinitis	C	0.97	7.08e-13	30013184	2018-07-16
rs72823628	2	102928617	[IL18R1]	rs10865050	1	allergy	G	1.13	7e-61	29083406	2017-10-30
rs72823628	2	102928617	[IL18R1]	rs950881	1	allergy	?	1.1236	6e-27	27182965	2016-05-16
rs72823628	2	102928617	[IL18R1]	rs13408661	0.986771	asthma	G	1.23	1e-09	23028483	2012-09-28
rs72823628	2	102928617	[IL18R1]	rs3771180	0.986771	asthma	?	NA	2e-15	21804549	2011-07-31
rs72823628	2	102928617	[IL18R1]	rs10197862	0.973136	seasonal_allergic_rhinitis,_asthma	A	1.24	4e-11	24388013	2013-12-30
rs72823628	2	102928617	[IL18R1]	rs3771175	0.960714	allergic_sensitization_measurement	T	1.2	5e-11	23817571	2013-06-30
rs72823628	2	102928617	[IL18R1]	rs202011557	0.932099	asthma	?	1.18765	5e-31	27182965	2016-05-16
rs72823628	2	102928617	[IL18R1]	rs10189629	0.814425	allergy	A	1.15581	2e-16	23817569	2013-06-30
rs72823628	2	102928617	[IL18R1]	rs3771166	0.286746	asthma	G	1.15	3e-09	20860503	2010-09-23
rs72823628	2	102928617	[IL18R1]	rs12470864	0.101189	allergy	NA	1.057	4e-26	29083406	2017-10-30
rs34290285	2	242698640	[D2HGDH]	rs34290285	1	allergy	G	1.082	4e-33	29083406	2017-10-30
rs34290285	2	242698640	[D2HGDH]	rs34290285	1	asthma	?	1.107	2e-15	27182965	2016-05-16
rs34290285	2	242698640	[D2HGDH]	rs35061832	0.653196	allergy	?	1.1	3e-13	27182965	2016-05-16
rs10187276	2	228670437	SLC19A3-[]-CCL20	rs10187276	1	childhood onset asthma	T	1.08	1.5e-19	30929738	2019-03-28
rs6780858	3	188132110	[LPP]	rs9860547	0.85305	allergy	A	1.07691	1e-09	23817569	2013-06-30
rs6780858	3	188132110	[LPP]	rs60946162	0.814652	allergy	T	1.041	9e-15	29083406	2017-10-30
rs6780858	3	188132110	[LPP]	rs2030519	0.765125	allergy	?	1.043	3e-08	27182965	2016-05-16
rs6780858	3	188132110	[LPP]	rs9865818	0.712527	allergic_sensitization_measurement	G	1.12	3e-10	23817571	2013-06-30
rs6531663	4	38792340	TLR10-[]-TLR1	rs4833095	0.983717	seasonal_allergic_rhinitis,_asthma	T	1.2	5e-12	24388013	2013-12-30
rs6531663	4	38792340	TLR10-[]-TLR1	rs17616434	0.912909	allergic_sensitization_measurement	T	1.23	5e-11	23817571	2013-06-30
rs6531663	4	38792340	TLR10-[]-TLR1	rs2101521	0.824064	allergy	A	1.14729	5e-21	23817569	2013-06-30
rs6531663	4	38792340	TLR10-[]-TLR1	rs5743618	0.817105	allergy	C	1.1	3e-58	29083406	2017-10-30
rs6531663	4	38792340	TLR10-[]-TLR1	rs5743618	0.817105	asthma	?	1.082	4e-11	27182965	2016-05-16
rs6531663	4	38792340	TLR10-[]-TLR1	rs11727978	0.64452	allergy	?	1.083	1e-15	27182965	2016-05-16
rs4648052	4	103515055	[NFKB1]	rs227275	0.224514	allergy	C	1.034	4e-11	29083406	2017-10-30
rs45613035	4	123141070	[KIAA1109]	rs150254607	0.800371	allergy	ATAT	1.078	5e-14	29083406	2017-10-30
rs45610037	4	123403008	IL2-[]--IL21	rs17454584	0.973539	allergic_sensitization_measurement	G	1.15	6e-10	23817571	2013-06-30
rs45610037	4	123403008	IL2-[]--IL21	rs17388568	0.788873	allergy	A	1.07541	4e-08	23817569	2013-06-30
rs45610037	4	123403008	IL2-[]--IL21	rs148505069	0.642899	allergy	?	1.056	4e-11	27182965	2016-05-16
rs45610037	4	123403008	IL2-[]--IL21	rs4145717	0.636605	allergy	T	1.059	9e-27	29083406	2017-10-30
rs7728612	5	110164674	SLC25A46-[]--TSLP	rs6869502	1	allergy	T	1.079	6e-29	29083406	2017-10-30
rs7728612	5	110164674	SLC25A46-[]--TSLP	rs1814576	0.397766	allergy	NA	1.121	1e-22	29083406	2017-10-30
rs7728612	5	110164674	SLC25A46-[]--TSLP	rs17513503	0.390375	seasonal_allergic_rhinitis	G	1.39	1e-08	22036096	2011-11-01
rs6594499	5	110470137	WDR36-[]-CAMK4	rs6594499	1	allergy	C	1.075	5e-46	29083406	2017-10-30
rs6594499	5	110470137	WDR36-[]-CAMK4	rs1438673	0.975642	allergy	C	1.11672	2e-20	23817569	2013-06-30
rs6594499	5	110470137	WDR36-[]-CAMK4	rs1438673	0.975642	allergy	?	1.06724	3e-17	27182965	2016-05-16
rs6594499	5	110470137	WDR36-[]-CAMK4	rs1438673	0.975642	seasonal_allergic_rhinitis,_asthma	C	1.16	3e-11	24388013	2013-12-30
rs6594499	5	110470137	WDR36-[]-CAMK4	rs1837253	0.0553707	allergy	NA	1.07	2e-31	29083406	2017-10-30
rs6594499	5	110470137	WDR36-[]-CAMK4	rs1837253	0.0553707	asthma	?	NA	1e-14	21804549	2011-07-31
rs6594499	5	110470137	WDR36-[]-CAMK4	rs1837253	0.0553707	asthma	C	1.17	1e-16	21804548	2011-07-31
rs6594499	5	110470137	WDR36-[]-CAMK4	rs1837253	0.0553707	asthma	?	1.14155	3e-31	27182965	2016-05-16
rs6594499	5	110470137	WDR36-[]-CAMK4	rs1837253	0.0553707	seasonal_allergic_rhinitis,_asthma	C	1.17	1e-09	24388013	2013-12-30
rs4705962	5	132028858	[KIF3A]	rs4705962	1	atopic_eczema	T	1.1	7e-12	26482879	2015-10-19
rs4705962	5	132028858	[KIF3A]	rs17690965	0.802351	childhood_onset_asthma,_atopic_eczema,_atopic_march	C	1.24	5e-08	26542096	2015-11-06
rs4705962	5	132028858	[KIF3A]	rs2897442	0.802351	atopic_eczema	C	1.09	1e-10	26482879	2015-10-19
rs4705962	5	132028858	[KIF3A]	rs2897442	0.802351	atopic_eczema	C	1.11	4e-08	22197932	2011-12-25
rs4705962	5	132028858	[KIF3A]	rs848	0.214905	allergy	A	1.068	2e-24	29083406	2017-10-30
rs4705962	5	132028858	[KIF3A]	rs1295686	0.207859	allergy	?	1.061	6e-10	27182965	2016-05-16
rs4705962	5	132028858	[KIF3A]	rs1295686	0.207859	atopic_eczema	A	1.383	2e-17	23886662	2013-07-25
rs4705962	5	132028858	[KIF3A]	rs1295686	0.207859	atopic_eczema	T	1.347	5e-09	25574825	2015-01-08
rs2854001	6	31323012	[HLA-B]	rs2854001	1	allergy	A	1.059	1e-19	29083406	2017-10-30
rs2854001	6	31323012	[HLA-B]	rs9266772	0.465755	allergy	C	1.1096	3e-12	23817569	2013-06-30
rs2854001	6	31323012	[HLA-B]	rs2428494	0.45782	asthma	?	1.08696	1e-16	27182965	2016-05-16
rs2854001	6	31323012	[HLA-B]	rs6932730	0.0930872	allergic_sensitization_measurement	T	1.14	4e-08	23817571	2013-06-30
rs6905282	6	32626015	HLA-DQA1-[]-HLA-DQB1	rs6906021	0.87257	allergic_sensitization_measurement	C	1.15	2e-12	23817571	2013-06-30
rs6905282	6	32626015	HLA-DQA1-[]-HLA-DQB1	rs6906021	0.87257	allergy	C	1.09911	7e-15	23817569	2013-06-30
rs6905282	6	32626015	HLA-DQA1-[]-HLA-DQB1	rs9273373	0.514431	seasonal_allergic_rhinitis,_asthma	G	1.24	4e-14	24388013	2013-12-30
rs6905282	6	32626015	HLA-DQA1-[]-HLA-DQB1	rs3104367	0.458068	asthma	?	1.14679	1e-40	27182965	2016-05-16
rs6905282	6	32626015	HLA-DQA1-[]-HLA-DQB1	rs9272346	0.396149	asthma	?	NA	2e-08	23181788	2012-12-04
rs6905282	6	32626015	HLA-DQA1-[]-HLA-DQB1	rs34004019	0.262394	allergy	?	1.10865	3e-24	27182965	2016-05-16
rs6905282	6	32626015	HLA-DQA1-[]-HLA-DQB1	rs34004019	0.262394	allergy	A	1.101	4e-52	29083406	2017-10-30
rs6905282	6	32626015	HLA-DQA1-[]-HLA-DQB1	rs7775228	0.248791	asthma	A	1.17	5e-15	21804548	2011-07-31
rs6905282	6	32626015	HLA-DQA1-[]-HLA-DQB1	rs7775228	0.248791	seasonal_allergic_rhinitis	C	1.33	2e-09	22036096	2011-11-01
rs6905282	6	32626015	HLA-DQA1-[]-HLA-DQB1	rs9275698	0.0540884	asthma	T	1.18	5e-12	21804548	2011-07-31
rs73739621	6	33033710	[HLA-DPA1]	rs987870	0.849505	asthma	C	1.4	2e-10	21814517	2011-07-21
rs73739621	6	33033710	[HLA-DPA1]	rs9500927	0.116081	asthma	T	1.13	4e-09	21804548	2011-07-31
rs2085423	7	50325815	C7orf72--[]-IKZF1	rs17664743	0.18099	allergy	A	1.042	6e-11	29083406	2017-10-30
rs7848215	9	6213468	RANBP6--[]-IL33	rs928413	1	childhood_onset_asthma	G	1.24	9e-13	24241537	2013-11-17
rs7848215	9	6213468	RANBP6--[]-IL33	rs2381416	0.981245	asthma	?	NA	2e-12	21804549	2011-07-31
rs7848215	9	6213468	RANBP6--[]-IL33	rs144829310	0.607823	allergy	T	1.09	1e-35	29083406	2017-10-30
rs7848215	9	6213468	RANBP6--[]-IL33	rs144829310	0.607823	asthma	?	1.165	1e-31	27182965	2016-05-16
rs7848215	9	6213468	RANBP6--[]-IL33	rs1342326	0.601961	asthma	C	1.2	9e-10	20860503	2010-09-23
rs7848215	9	6213468	RANBP6--[]-IL33	rs72699186	0.596158	seasonal_allergic_rhinitis,_asthma	T	1.26	2e-09	24388013	2013-12-30
rs7848215	9	6213468	RANBP6--[]-IL33	rs7032572	0.56935	allergy	G	1.12019	2e-09	23817569	2013-06-30
rs7848215	9	6213468	RANBP6--[]-IL33	rs10975488	0.551849	allergy	?	1.087	8e-11	27182965	2016-05-16
rs635634	9	136155000	ABO-[]-SURF6	rs2519093	1	allergy	?	1.055	4e-08	27182965	2016-05-16
rs12572775	10	104285594	[SUFU]	rs10883723	0.533492	allergy	C	1.03	2e-08	29083406	2017-10-30
rs10791824	11	65559266	[OVOL1]	rs10791824	1	atopic_eczema	G	1.12	2e-19	26482879	2015-10-19
rs10791824	11	65559266	[OVOL1]	rs479844	0.905241	allergy	G	1.038	2e-13	29083406	2017-10-30
rs10791824	11	65559266	[OVOL1]	rs479844	0.905241	atopic_eczema	G	1.14	1e-13	22197932	2011-12-25
rs10791824	11	65559266	[OVOL1]	rs479844	0.905241	atopic_eczema	?	1.11111	2e-18	26482879	2015-10-19
rs10791824	11	65559266	[OVOL1]	rs479844	0.905241	childhood_onset_asthma,_atopic_eczema,_atopic_march	G	1.25	4e-10	26542096	2015-11-06
rs11236791	11	76295598	WNT11--[]-LRRC32	rs2212434	0.958376	atopic_eczema	?	1.29	3e-12	25574825	2015-01-08
rs11236791	11	76295598	WNT11--[]-LRRC32	rs2212434	0.958376	atopic_eczema	T	1.09	5e-13	26482879	2015-10-19
rs11236791	11	76295598	WNT11--[]-LRRC32	rs2212434	0.958376	food_allergy_measurement	T	1.29	9e-11	29051540	2017-10-20
rs11236791	11	76295598	WNT11--[]-LRRC32	rs7936323	0.907697	allergy	?	1.06045	1e-14	27182965	2016-05-16
rs11236791	11	76295598	WNT11--[]-LRRC32	rs7936323	0.907697	allergy	A	1.088	2e-63	29083406	2017-10-30
rs11236791	11	76295598	WNT11--[]-LRRC32	rs7936323	0.907697	asthma	?	1.0846	1e-16	27182965	2016-05-16
rs11236791	11	76295598	WNT11--[]-LRRC32	rs2155219	0.816122	allergic_sensitization_measurement	T	1.18	1e-18	23817571	2013-06-30
rs11236791	11	76295598	WNT11--[]-LRRC32	rs2155219	0.816122	allergy	T	1.11416	2e-19	23817569	2013-06-30
rs11236791	11	76295598	WNT11--[]-LRRC32	rs2155219	0.816122	seasonal_allergic_rhinitis	T	1.17	4e-08	22036096	2011-11-01
rs11236791	11	76295598	WNT11--[]-LRRC32	rs2155219	0.816122	childhood_onset_asthma,_atopic_eczema,_atopic_march	1.33	T	2e-15	26542096	2015-11-06
rs11236791	11	76295598	WNT11--[]-LRRC32	rs2155219	0.816122	seasonal_allergic_rhinitis	1.22	T	1e-08	22036096	2011-11-01
rs11236791	11	76295598	WNT11--[]-LRRC32	rs7130588	0.630438	asthma	G	1.09	2e-08	21907864	2011-09-10
rs11236791	11	76295598	WNT11--[]-LRRC32	rs7130588	0.630438	atopic_eczema	G	1.29	4e-13	23886662	2013-07-25
rs11236791	11	76295598	WNT11--[]-LRRC32	rs7927894	0.563925	atopic_eczema	T	1.08	3e-09	26482879	2015-10-19
rs11236791	11	76295598	WNT11--[]-LRRC32	rs7927894	0.563925	atopic_eczema	A	1.22	8e-10	19349984	2009-04-06
rs11236791	11	76295598	WNT11--[]-LRRC32	rs55646091	0.0743098	allergy	A	1.179	2e-40	29083406	2017-10-30
rs55646091	11	76299431	WNT11--[]-LRRC32	rs55646091	1	allergy	A	1.179	2e-40	29083406	2017-10-30
rs55646091	11	76299431	WNT11--[]-LRRC32	rs7130588	0.118933	asthma	G	1.09	2e-08	21907864	2011-09-10
rs55646091	11	76299431	WNT11--[]-LRRC32	rs7130588	0.118933	atopic_eczema	G	1.29	4e-13	23886662	2013-07-25
rs55646091	11	76299431	WNT11--[]-LRRC32	rs7927894	0.110602	atopic_eczema	T	1.08	3e-09	26482879	2015-10-19
rs55646091	11	76299431	WNT11--[]-LRRC32	rs7927894	0.110602	atopic_eczema	A	1.22	8e-10	19349984	2009-04-06
rs55646091	11	76299431	WNT11--[]-LRRC32	rs2212434	0.0803864	atopic_eczema	?	1.29	3e-12	25574825	2015-01-08
rs55646091	11	76299431	WNT11--[]-LRRC32	rs2212434	0.0803864	atopic_eczema	T	1.09	5e-13	26482879	2015-10-19
rs55646091	11	76299431	WNT11--[]-LRRC32	rs2212434	0.0803864	food_allergy_measurement	T	1.29	9e-11	29051540	2017-10-20
rs55646091	11	76299431	WNT11--[]-LRRC32	rs7936323	0.0718616	allergy	?	1.06045	1e-14	27182965	2016-05-16
rs55646091	11	76299431	WNT11--[]-LRRC32	rs7936323	0.0718616	allergy	A	1.088	2e-63	29083406	2017-10-30
rs55646091	11	76299431	WNT11--[]-LRRC32	rs7936323	0.0718616	asthma	?	1.0846	1e-16	27182965	2016-05-16
rs55646091	11	76299431	WNT11--[]-LRRC32	rs2155219	0.0616069	allergic_sensitization_measurement	T	1.18	1e-18	23817571	2013-06-30
rs55646091	11	76299431	WNT11--[]-LRRC32	rs2155219	0.0616069	allergy	T	1.11416	2e-19	23817569	2013-06-30
rs55646091	11	76299431	WNT11--[]-LRRC32	rs2155219	0.0616069	childhood_onset_asthma,_atopic_eczema,_atopic_march	T	1.33	2e-15	26542096	2015-11-06
rs55646091	11	76299431	WNT11--[]-LRRC32	rs2155219	0.0616069	seasonal_allergic_rhinitis	T	1.22	1e-08	22036096	2011-11-01
rs55646091	11	76299431	WNT11--[]-LRRC32	rs2155219	0.0616069	seasonal_allergic_rhinitis	T	1.17	4e-08	22036096	2011-11-01
rs4938576	11	118746769	DDX6-[]-CXCR5	rs12365699	0.238269	allergy	G	1.061	5e-18	29083406	2017-10-30
rs4938576	11	118746769	DDX6-[]-CXCR5	rs11217036	0.13223	allergy	?	1.06496	9e-11	27182965	2016-05-16
rs61907712	11	128161142	KIRREL3-AS3---[]--ETS1	rs56129466	0.87756	allergy	A	1.047	2e-13	29083406	2017-10-30
rs61907712	11	128161142	KIRREL3-AS3---[]--ETS1	rs7127307	0.188965	atopic_eczema	C	NA	1e-20	26482879	2015-10-19
rs61907712	11	128161142	KIRREL3-AS3---[]--ETS1	rs7127307	0.188965	atopic_eczema	T	1.06383	2e-18	26482879	2015-10-19
rs705699	12	56384804	[RAB5B]	rs10876864	0.863088	allergy	G	1.047	1e-19	29083406	2017-10-30
rs705699	12	56384804	[RAB5B]	rs1701704	0.674746	asthma	G	1.19	2e-13	21804548	2011-07-31
rs705699	12	56384804	[RAB5B]	rs2069408	0.480089	asthma	C	1.15	1e-10	21804548	2011-07-31
rs3024971	12	57493727	[STAT6]	rs1059513	1	allergic_sensitization_measurement	T	1.3	1e-14	23817571	2013-06-30
rs3024971	12	57493727	[STAT6]	rs1059513	1	allergy	T	1.084	1e-22	29083406	2017-10-30
rs3024971	12	57493727	[STAT6]	rs3001426	0.0867633	asthma	?	1.0661	1e-10	27182965	2016-05-16
rs597808	12	111973358	[ATXN2]	rs7137828	0.971326	allergy	T	1.033	2e-10	29083406	2017-10-30
rs9431	12	121202664	[SPPL3]	rs6489785	0.405789	allergy	T	1.043	2e-15	29083406	2017-10-30
rs1853573	13	43034968	AKAP11--[]--TNFSF11	rs7328203	0.91	allergic rhinitis	G	1.03	1.28e-10	30013184	2018-07-16
rs7140939	14	68760527	[RAD51B]	rs2104047	0.642474	allergy	T	1.042	2e-13	29083406	2017-10-30
rs7140939	14	68760527	[RAD51B]	rs3784099	0.625441	asthma	?	1.06157	2e-08	27182965	2016-05-16
rs56101042	14	103256961	[TRAF3]	rs9989163	0.200605	allergy	A	1.029	2e-08	29083406	2017-10-30
rs11071559	15	61069988	[RORA]	rs10519067	0.986004	allergy	G	1.055	9e-13	29083406	2017-10-30
rs11071559	15	61069988	[RORA]	rs10519068	0.972305	asthma	?	1.1	4e-11	27182965	2016-05-16
rs56062135	15	67455630	[SMAD3]	rs17228058	0.980909	allergy	G	1.0821	1e-08	23817569	2013-06-30
rs56062135	15	67455630	[SMAD3]	rs56375023	0.971552	allergy	A	1.073	8e-32	29083406	2017-10-30
rs56062135	15	67455630	[SMAD3]	rs56375023	0.971552	asthma	?	1.11483	2e-21	27182965	2016-05-16
rs56062135	15	67455630	[SMAD3]	rs17294280	0.711933	allergy	?	1.053	4e-08	27182965	2016-05-16
rs56062135	15	67455630	[SMAD3]	rs17294280	0.711933	seasonal_allergic_rhinitis,_asthma	G	1.18	4e-09	24388013	2013-12-30
rs56062135	15	67455630	[SMAD3]	rs744910	0.34716	asthma	G	1.12	4e-09	20860503	2010-09-23
rs2601191	15	90936225	[IQGAP1]	rs3540	0.415918	allergy	G	1.036	3e-11	29083406	2017-10-30
rs2041733	16	11229589	[CLEC16A]	rs2041733	1	atopic_eczema	T	1.08	3e-11	26482879	2015-10-19
rs2041733	16	11229589	[CLEC16A]	rs11644510	0.424126	allergy	?	1.07066	2e-16	27182965	2016-05-16
rs2041733	16	11229589	[CLEC16A]	rs11644510	0.424126	allergy	C	1.072	6e-38	29083406	2017-10-30
rs2041733	16	11229589	[CLEC16A]	rs62026376	0.32464	seasonal_allergic_rhinitis,_asthma	C	1.17	1e-08	24388013	2013-12-30
rs2041733	16	11229589	[CLEC16A]	rs7203459	0.322018	asthma	?	1.092	4e-15	27182965	2016-05-16
rs4795400	17	38067020	[GSDMB]	rs4795400	1	allergy	?	1.0627	3e-15	27182965	2016-05-16
rs4795400	17	38067020	[GSDMB]	rs2305480	0.966091	childhood_onset_asthma	G	1.32	6e-23	24241537	2013-11-17
rs4795400	17	38067020	[GSDMB]	rs11078927	0.959267	asthma	C	1.52	1e-12	28461288	2017-05-01
rs4795400	17	38067020	[GSDMB]	rs11078927	0.959267	asthma	?	NA	2e-16	21804549	2011-07-31
rs4795400	17	38067020	[GSDMB]	rs4795397	0.916555	asthma	A	NA	4e-12	28461288	2017-05-01
rs4795400	17	38067020	[GSDMB]	rs907092	0.865592	asthma	G	1.41	1e-12	28461288	2017-05-01
rs4795400	17	38067020	[GSDMB]	rs10445308	0.856456	childhood_onset_asthma,_atopic_eczema,_atopic_march	C	1.22	5e-08	26542096	2015-11-06
rs4795400	17	38067020	[GSDMB]	rs2290400	0.809846	asthma	C	1.34	3e-20	27439200	2016-07-20
rs4795400	17	38067020	[GSDMB]	rs7216389	0.806271	asthma	T	1.45	9e-11	17611496	2007-07-26
rs4795400	17	38067020	[GSDMB]	rs921650	0.806271	allergy	A	1.059	6e-30	29083406	2017-10-30
rs4795400	17	38067020	[GSDMB]	rs11655198	0.783064	asthma	?	1.18064	1e-63	27182965	2016-05-16
rs4795400	17	38067020	[GSDMB]	rs9303280	0.759628	allergy	T	1.07111	9e-09	23817569	2013-06-30
rs4795400	17	38067020	[GSDMB]	rs4794820	0.736927	asthma	?	1.33	1e-08	22561531	2012-05-05
rs4795400	17	38067020	[GSDMB]	rs3894194	0.33097	asthma	A	1.17	5e-09	20860503	2010-09-23
rs4795400	17	38067020	[GSDMB]	rs11652139	0.278483	allergy	NA	1.051	8e-22	29083406	2017-10-30
rs7216890	17	38756969	CCR7-[]-SMARCE1	rs11464691	0.657827	allergy	NA	1.052	1e-21	29083406	2017-10-30
rs3017289	18	51780408	MBD2-[]-POLI	rs12965763	0.66	childhood onset asthma	A	1.06	4.3e-11	30929738	2019-03-28
rs4574025	18	60009814	[TNFRSF11A]	rs4574025	1	allergy	T	1.03	7e-09	29083406	2017-10-30
rs12964116	18	61442619	[SERPINB7]	rs12964116	1	food_allergy_measurement	G	1.9	2e-08	29051540	2017-10-20
rs2918302	19	8785744	ADAMTS10--[]-ACTL9	rs2164983	0.98861	atopic_eczema	A	1.12	2e-11	26482879	2015-10-19
rs2918302	19	8785744	ADAMTS10--[]-ACTL9	rs2164983	0.98861	atopic_eczema	A	1.16	7e-09	22197932	2011-12-25
rs2918302	19	8785744	ADAMTS10--[]-ACTL9	rs2918307	0.98861	atopic_eczema	G	1.12	5e-12	26482879	2015-10-19
Sentinel SNPs identified in the multivariate GWAS
rs10910095	1	2510755	TNFRSF14-[]-FAM213B	rs10910095	1	allergy	G	1.042	3e-08	29083406	2017-10-30
rs12068304	1	212864992	[BATF3]	rs12750027	0.28	childhood onset asthma	A	1.11	2.6e-10	30929738	2019-03-28
rs143326447	2	112268732	BCL2L11--[]--ANAPC1	rs13403656	0.842388	allergy	A	1.045	2e-08	29083406	2017-10-30
rs35570272	3	33047662	[GLB1]	rs6776757	0.238964	allergy	G	1.033	3e-10	29083406	2017-10-30
rs35570272	3	33047662	[GLB1]	rs7613051	0.0788017	atopic_eczema	A	1.29	6e-21	23042114	2012-10-07
rs6596086	5	131952222	[RAD50]	rs6596086	1	atopic_eczema,_psoriasis	?	NA	2e-18	25574825	2015-01-08
rs6596086	5	131952222	[RAD50]	rs2244012	0.989637	asthma	?	1.102	2e-16	27182965	2016-05-16
rs6596086	5	131952222	[RAD50]	rs3091307	0.979279	allergy	NA	1.062	4e-21	29083406	2017-10-30
rs6596086	5	131952222	[RAD50]	rs12188917	0.958823	atopic_eczema	C	1.14	4e-17	26482879	2015-10-19
rs6596086	5	131952222	[RAD50]	rs1295686	0.233894	allergy	?	1.061	6e-10	27182965	2016-05-16
rs6596086	5	131952222	[RAD50]	rs1295686	0.233894	atopic_eczema	A	1.383	2e-17	23886662	2013-07-25
rs6596086	5	131952222	[RAD50]	rs1295686	0.233894	atopic_eczema	T	1.347	5e-09	25574825	2015-01-08
rs6596086	5	131952222	[RAD50]	rs848	0.217413	allergy	A	1.068	2e-24	29083406	2017-10-30
rs28483633	6	32624874	HLA-DQA1-[]-HLA-DQB1	rs34004019	0.0537458	allergy	?	1.10865	3e-24	27182965	2016-05-16
rs28483633	6	32624874	HLA-DQA1-[]-HLA-DQB1	rs34004019	0.0537458	allergy	A	1.101	4e-52	29083406	2017-10-30
rs2255088	10	6625378	[PRKCQ-AS1]	rs943451	0.75	childhood onset asthma	T	1.06	3.5e-15	30929738	2019-03-28
rs2066844	16	50745926	[NOD2]	rs2066844	1	childhood onset asthma	T	1.12	1.3e-10	30929738	2019-03-28
rs12951632	17	40741013	[FAM134C]	rs7207591	0.156425	allergy	A	1.038	1e-09	29083406	2017-10-30
rs35014537	18	48558415	[SMAD4]	rs1893380	0.95	childhood onset asthma	C	1.06	3.6e-13	30929738	2019-03-28
rs4807630	19	1170445	[SBNO2]	rs892225	0.68	childhood onset asthma	C	1.06	1.1e-12	30929738	2019-03-28
